# Supplementary material for: ARA-PEPs: a repository of putative sORF-encoded peptides in Arabidopsis thaliana
Source: PubMed Central journal article supplement (PMC5240266; doi:10.1186/s12859-016-1458-y), 2017-01-17
Supplement: 12859_2016_1458_MOESM5_ESM.pdf [file 12859_2016_1458_MOESM5_ESM.pdf]

### RNA-seq samples

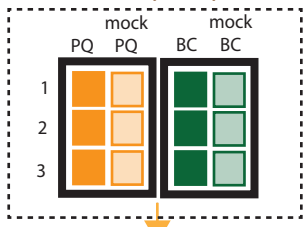

### Tiling Array samples

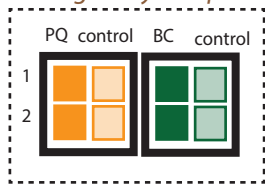

hybridize to tiling arrays

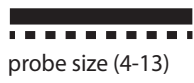

Lease & Walker, 2006

**Secreted peptides**

map peptides to TAIR10 assembly

16,809 peptides

retain peptides with transcript evidence

5,240 peptides

Hanada et al., 2007, 2013

**sORFs**

7,901 peptides

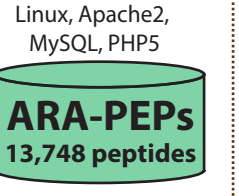

.FASTQ Paired end reads

Quality Control of reads

TopHat2

.BAM aligned reads

HTSeq-count

Cufflinks

total gene counts

Cuffmerge

Cuffcompare

Cuffdiff

**TARs**

189 TARs

6 frame translations

**SIPs**

607 peptides

### sequence conservation

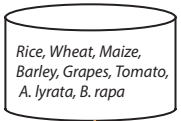

tBLASTn

279 homologous SIPs

PAML4.8

159 SIPs dN/dS<1

Mean alignment score

hmmsearch

BLASTP

Map peptides

ScanProsite

ELM.eu.org

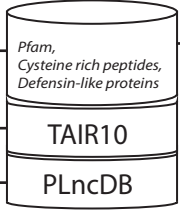

Pfam2GO

### Functional analysis

All vs all BLASTP

mcl Blast E-value as weights

1377 peptide clusters

SignalP  
5,430 secreted peptides

TMHMM  
2,510 peptides with TM domains
