# Supplementary material for: ARA-PEPs: a repository of putative sORF-encoded peptides in Arabidopsis thaliana
Source: PubMed Central journal article supplement (PMC5240266; doi:10.1186/s12859-016-1458-y), 2017-01-17
Supplement: 12859_2016_1458_MOESM6_ESM.pdf [file 12859_2016_1458_MOESM6_ESM.pdf]

U6acat1XLOC\_029972  
 AT5G58810XLOC\_027460  
 AT4G14226XLOC\_022954  
 AT5G42720XLOC\_030992  
 AT3G43826,AT3G43828XLOC\_018388  
 AT5G47130XLOC\_026822  
 NAIXLOC\_000752  
 S-ACP\_DESSXLOC\_025180  
 AT4G40080XLOC\_021951  
 AT2G07689,AT2G07792,AT2G07906XLOC\_008352  
 AT2G07708,AT2G07708XLOC\_005866  
 AT1G1185XLOC\_000515  
 AT3G18777XLOC\_014113  
 NAIXLOC\_020802  
 NP2XLOC\_021213  
 CHI-BIXLOC\_016952  
 NAIXLOC\_026674  
 TPRXLOC\_030607  
 AT3G17110XLOC\_014018  
 AT3G59695XLOC\_019305  
 IOD13XLOC\_016118  
 ABC11XLOC\_001551  
 AT1G76980XLOC\_007706  
 ATACA2XLOC\_009477  
 NAIXLOC\_029753  
 AT5G24205,AT5G24206XLOC\_029060  
 AT2G07698,AT2G07798,AT2G07826XLOC\_008357  
 NAIXLOC\_027928  
 AT5G01215XLOC\_027928  
 AT2G07783XLOC\_006349  
 AT5G44585XLOC\_026683  
 AT2G15120XLOC\_008743  
 AT5G28280XLOC\_025735  
 AT1G7118XLOC\_003872  
 AT5G60290XLOC\_031061  
 AT5G36022XLOC\_031045  
 AT3G49140,POMP-H77XLOC\_018721  
 5PTASE14,AT2G31840XLOC\_012292  
 AT2G24160,HHP3XLOC\_011856  
 CSLA7,CTF2XLOC\_009887  
 AT1G17640,AT1G17665,GLP2XLOC\_004921  
 AT3G21300XLOC\_017417  
 HHP3XLOC\_009253  
 TPRXLOC\_027049  
 LAC17XLOC\_027519  
 AT2G44260XLOC\_010348  
 AT4G40080XLOC\_024361  
 AT3G01202,AT3G01210XLOC\_013193  
 AT1G62310XLOC\_006943  
 AT1G45229,AT1G45248XLOC\_006159  
 AT3G2948XLOC\_014519  
 AT1G35660XLOC\_001879  
 RHA4AIXLOC\_023521  
 AT1G45234,AT1G45236,AT1G45238,AT1G45240,THO5AIXLOC\_002239  
 CALS1XLOC\_012555  
 AT5G25640,ATRBL11XLOC\_029141  
 AT4G13150XLOC\_022866  
 AT3G07273,AT3G07274,AT3G07280,AT3G07290XLOC\_016689  
 AT5G60285,LECRK17,LECRK18XLOC\_027529  
 AT2G33490XLOC\_009760  
 IPCS2XLOC\_010010  
 AT3G17710,AT3G17712,AT3G17715XLOC\_014053  
 AT5G60700XLOC\_031075  
 AT3G21295XLOC\_014265  
 RP2XLOC\_016326  
 ASIL2,AT3G14172XLOC\_017064  
 AT5G34853XLOC\_026043  
 AT3G50590XLOC\_015647  
 AT1G37131,GLX3XLOC\_007714  
 AT2G44255,NCS8XLOC\_012984  
 AT1G55525,TBP2XLOC\_006624  
 SEC3AIXLOC\_002287  
 AT1G18800XLOC\_000459  
 ASK18,AT1G10220XLOC\_000465  
 AT3G46658,AT3G46668XLOC\_015432  
 GORXLOC\_029785  
 AILIG6,MIR163XLOC\_003323  
 AT5G01210XLOC\_024386  
 AT1G58590XLOC\_006751  
 LURP1XLOC\_008694  
 AIRLP49XLOC\_020529  
 AT2G35656XLOC\_012497  
 AT3G57157XLOC\_015997  
 AT1G25422XLOC\_001279  
 AT5G16235XLOC\_028668  
 NAIXLOC\_013166  
 AT3G12520XLOC\_013754  
 NAIXLOC\_013174  
 AT5G5420XLOC\_027282  
 AT3G04717XLOC\_016525  
 AT3G15534XLOC\_013928  
 AT5G14602XLOC\_025030  
 NAIXLOC\_024374  
 AT5G5416XLOC\_027210  
 UGT7E12XLOC\_018594  
 AT3G61185XLOC\_019397  
 AT2G14661XLOC\_011323

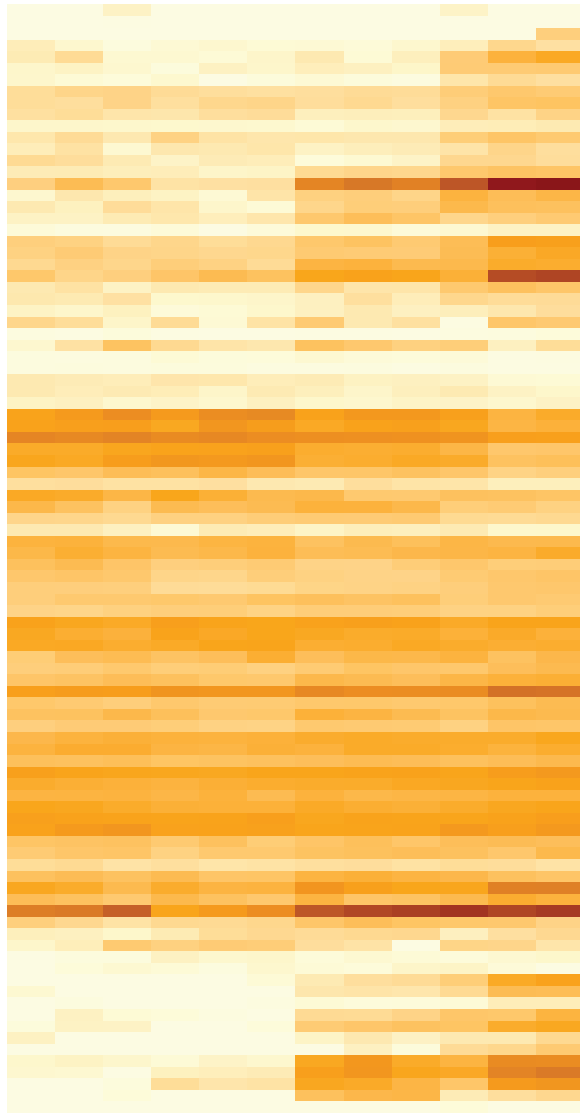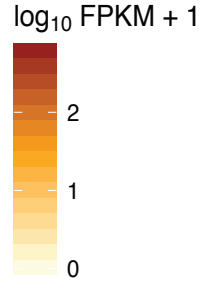

MOCK\_BC\_2  
 MOCK\_BC\_1  
 MOCK\_BC\_0  
 MOCK\_PQ\_2  
 MOCK\_PQ\_1  
 MOCK\_PQ\_0  
 PQ\_0  
 PQ\_1  
 PQ\_2  
 BC\_2  
 BC\_0  
 BC\_1
