# Supplementary material for: ARA-PEPs: a repository of putative sORF-encoded peptides in Arabidopsis thaliana
Source: PubMed Central journal article supplement (PMC5240266; doi:10.1186/s12859-016-1458-y), 2017-01-17

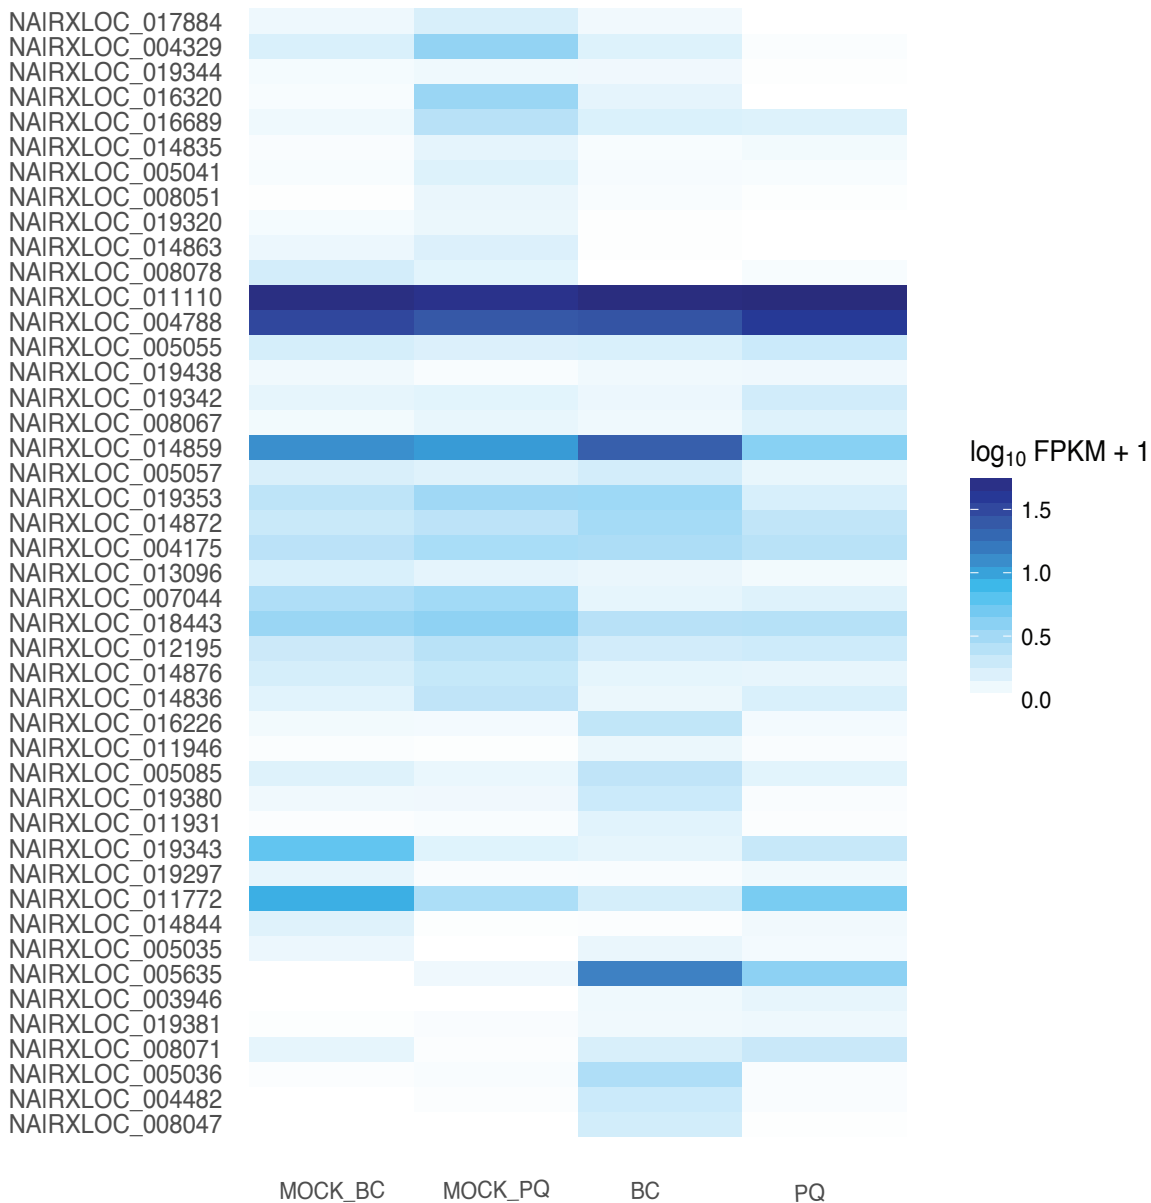

Supplement: 12859_2016_1458_MOESM7_ESM.pdf [file 12859_2016_1458_MOESM7_ESM.pdf]
