# Supplementary material for: ARA-PEPs: a repository of putative sORF-encoded peptides in Arabidopsis thaliana
Source: PubMed Central journal article supplement (PMC5240266; doi:10.1186/s12859-016-1458-y), 2017-01-17
Supplement: 12859_2016_1458_MOESM10_ESM.pdf [file 12859_2016_1458_MOESM10_ESM.pdf]

SecretedPeptides  
(Lease & Walker, 2006)

sORFs  
(Hanada et al., 2007, 2013)

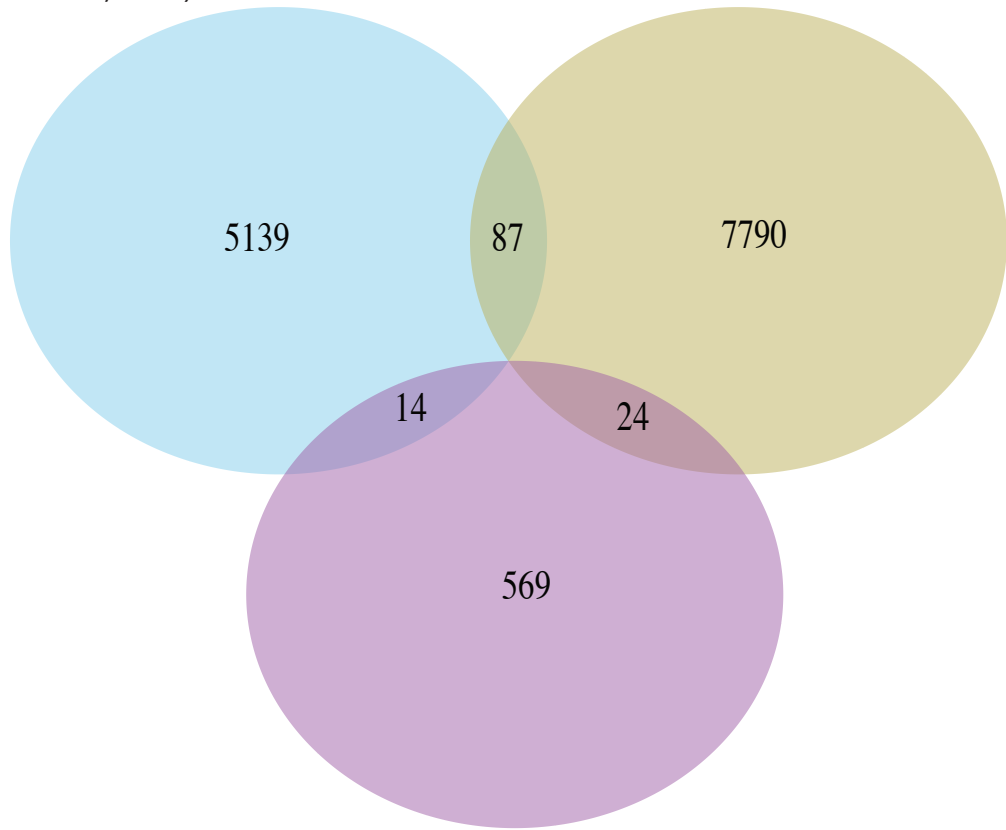

SIPs  
(De Coninck et al., 2013; current manuscript)
